# Supplementary material for: Long-Term Co-Circulation of Host-Specialist and Host-Generalist Lineages of Group B Streptococcus in Brazilian Dairy Cattle with Heterogeneous Antimicrobial Resistance Profiles
Source: MDPI journal article supplement (doi:10.3390/antibiotics13050389), 2024-04-25
Supplement: s1 [file s1]

**Table S1.** Distribution of bovine Group B *Streptococcus* isolates collected in Brazil from 1987 to 2021 according to the year of isolation, herd of origin, sequence type (ST), clonal complex (CC), capsular type, and presence of antimicrobial resistance (AMR) genes and mobile genetic elements (MGE).

| Herd | Year | Total number of isolates | Number of isolates per profile | ST                                               | CC        | Capsular type | AMR genes               | MGE          |
|------|------|--------------------------|--------------------------------|--------------------------------------------------|-----------|---------------|-------------------------|--------------|
| H1   | 2001 | 1                        | 1                              | 103                                              | 103       | Ia            | <i>tetM</i>             | Tn6009       |
| H2   | 2001 | 1                        | 1                              | 67                                               | 61/67     | NT*           | <i>aadE, ermB, tetO</i> | not detected |
| H3   | 2002 | 9                        | 8                              | 91                                               | 91        | III           | not detected            | not detected |
|      | 2002 |                          | 1                              | not determined ( <i>glcK</i> atypical) - CC91    | 91        | III           | not detected            | not detected |
| H4   | 2002 | 7                        | 7                              | 91                                               | 91        | III           | not detected            | not detected |
| H5   | 2001 | 1                        | 1                              | 103                                              | 103       | Ia            | <i>tetM</i>             | Tn6009       |
| H6   | 2004 | 17                       | 1                              | not determined ( <i>glcK</i> atypical) - CC103   | 103       | Ia            | <i>tetM</i>             | Tn6009       |
|      | 2004 |                          | 9                              | 103                                              | 103       | Ia            | <i>tetO</i>             | not detected |
|      | 2004 |                          | 6                              | 103                                              | 103       | Ia            | not detected            | not detected |
|      | 2004 |                          | 1                              | 91                                               | 91        | III           | not detected            | not detected |
| H7   | 1987 | 1                        | 1                              | 61                                               | 61/67     | II            | <i>tetM</i>             | Tn6009       |
| H8   | 1987 | 1                        | 1                              | 19                                               | 19        | III           | not detected            | not detected |
| H9   | 1987 | 1                        | 1                              | 17                                               | Singleton | III           | <i>tetM</i>             | not detected |
| H10  | 2015 | 14                       | 11                             | 91                                               | 91        | III           | not detected            | not detected |
|      | 2015 |                          | 1                              | not determined ( <i>glcK</i> atypical) - CC91    | 91        | III           | not detected            | not detected |
|      | 2015 |                          | 2                              | not determined ( <i>glcK</i> atypical) - CC91    | 91        | III           | <i>aadE, ermB, tetO</i> | not detected |
| H11  | 1998 | 5                        | 1                              | not determined ( <i>glcK</i> atypical) - CC61/67 | 61/67     | III           | <i>tetO</i>             | not detected |
|      | 1998 |                          | 3                              | 1929                                             | 61/67     | III           | <i>tetO</i>             | not detected |
|      | 2000 |                          | 1                              | 67                                               | 61/67     | III           | <i>aadE, ermB, tetO</i> | not detected |
| H13  | 1999 | 2                        | 2                              | not determined ( <i>glcK</i> atypical) - CC61/67 | 61/67     | III           | not detected            | not detected |
| H12  | 1999 | 3                        | 3                              | 91                                               | 91        | III           | not detected            | not detected |
| H15  | 1999 | 1                        | 1                              | 67                                               | 61/67     | II            | <i>aadE, ermB, tetO</i> | not detected |
| H14  | 2015 | 7                        | 2                              | 91                                               | 91        | III           | <i>ermB, tetO</i>       | not detected |
|      | 2015 |                          | 1                              | not determined ( <i>glcK</i> atypical) - CC91    | 91        | III           | <i>ermB, tetO</i>       | not detected |

|     |      |    |    |                                                  |           |     |                               |                 |
|-----|------|----|----|--------------------------------------------------|-----------|-----|-------------------------------|-----------------|
|     | 2015 |    | 1  | 103                                              | 103       | Ia  | <i>aadE, ermB, tetO</i>       | not detected    |
|     | 2015 |    | 3  | 1918                                             | 103       | Ia  | <i>tetM</i>                   | Tn6009          |
| H16 | 2015 | 11 | 11 | 103                                              | 103       | Ia  | <i>aadE, ermB, tetO</i>       | not detected    |
| H17 | 2010 | 8  | 7  | 103                                              | 103       | Ia  | <i>aadE, ermB, tetO</i>       | not detected    |
|     | 2010 |    | 1  | 19                                               | 19        | V   | <i>tetM</i>                   | not detected    |
| H18 | 2021 | 4  | 2  | 67                                               | 61/67     | II  | <i>ermB, tetO</i>             | not detected    |
|     | 2021 |    | 1  | 91                                               | 91        | III | not detected                  | not detected    |
|     | 2020 |    | 1  | not determined ( <i>glcK</i> atypical) - CC91    |           | III | <i>aadE, ermB, tetO</i>       | not detected    |
| H19 | 1996 | 1  | 1  | 343                                              | Singleton | III | <i>aadE, ermB, tetO</i>       | not detected    |
|     | 1998 | 3  | 1  | not determined ( <i>glcK</i> atypical) - CC61/67 |           | III | not detected                  | not detected    |
|     | 1999 |    | 1  | 91                                               | 91        | III | not detected                  | not detected    |
|     | 1999 |    | 1  | 1930                                             | 61/67     | III | not detected                  | not detected    |
| H21 | 1999 | 5  | 1  | 103                                              | 103       | Ia  | <i>tetO</i>                   | not detected    |
|     | 1999 |    | 4  | 1930                                             | 61/67     | III | <i>tetM</i>                   | Tn6009          |
| H22 | 1998 | 1  | 1  | 55                                               | 23        | III | not detected                  | not detected    |
| H23 | 2000 | 1  | 1  | not determined ( <i>glcK</i> atypical) - CC1     |           | Ia  | <i>tetO</i>                   | not detected    |
| H24 | 2007 | 1  | 1  | 1                                                | 1         | V   | <i>aadE, ermB, tetO</i>       | not detected    |
| H34 | 2000 | 1  | 1  | 103                                              | 103       | Ia  | <i>tetO</i>                   | not detected    |
| H27 | 2007 | 1  | 1  | 1                                                | 1         | V   | <i>aadE, ermB, tetO, tetM</i> | Tn6009          |
| H25 | 2006 | 1  | 1  | 23                                               | 23        | Ia  | <i>tetM</i>                   | not detected    |
| H26 | 2007 | 2  | 1  | 1                                                | 1         | V   | <i>aadE, ermB, tetO</i>       | not detected    |
|     | 2007 |    | 1  | 1                                                | 1         | V   | <i>aadE, ermB, tetO, tetM</i> | Tn6009          |
| H28 | 2007 | 2  | 2  | not determined ( <i>glcK</i> atypical) - CC103   |           | Ia  | <i>tetM</i>                   | ISLgar5 (IS256) |
| H29 | 2007 | 1  | 1  | 314                                              | 103       | Ia  | <i>tetM</i>                   | ISLgar5 (IS256) |
| H30 | 2007 | 3  | 2  | 103                                              | 103       | Ia  | <i>tetM</i>                   | ISLgar5 (IS256) |

|     |      |    |    |                                                |           |     |                         |                 |
|-----|------|----|----|------------------------------------------------|-----------|-----|-------------------------|-----------------|
|     | 2007 |    | 1  | not determined ( <i>glcK</i> atypical) - CC103 | 103       | Ia  | <i>tetM</i>             | ISLgar5 (IS256) |
| H31 | 2007 | 1  | 1  | not determined ( <i>glcK</i> atypical) - CC103 | 103       | Ia  | <i>tetM</i>             | ISLgar5 (IS256) |
| H32 | 2006 | 1  | 1  | not determined ( <i>glcK</i> atypical) - CC103 | 103       | Ia  | <i>tetO</i>             | not detected    |
| H33 | 2006 | 1  | 1  | 1                                              | 1         | V   | <i>ermA, tetM</i>       | Tn6009          |
| H35 | 2000 | 2  | 1  | 196                                            | 1         | IV  | <i>tetM</i>             | Tn6009          |
|     | 2000 |    | 1  | 1                                              | 1         | V   | <i>tetM</i>             | Tn6009          |
| H36 | 2021 | 13 | 2  | 1934                                           | 91        | III | not detected            | not detected    |
|     | 2021 |    | 11 | 103                                            | 103       | Ia  | <i>tetM</i>             | not detected    |
| H37 | 1996 | 1  | 1  | 1932                                           | 61/67     | II  | <i>aadE, lnuC, tetO</i> | not detected    |
| H40 | 2021 | 4  | 4  | not determined ( <i>glcK</i> atypical) - CC91  | 91        | III | <i>aadE, ermB, tetO</i> | not detected    |
| H41 | 2021 | 1  | 1  | 1927                                           | Singleton | II  | <i>tetO</i>             | not detected    |
| H39 | 2000 | 1  | 1  | not determined ( <i>glcK</i> atypical) - CC103 | 103       | Ia  | <i>ermB, tetO</i>       | not detected    |
| H42 | 2020 | 6  | 5  | 91                                             | 91        | III | not detected            | not detected    |
|     | 2020 |    | 1  | not determined ( <i>glcK</i> atypical) - CC91  | 91        | III | not detected            | not detected    |
| H38 | 1999 | 5  | 5  | 91                                             | 91        | III | not detected            | not detected    |
| H43 | 2021 | 1  | 1  | 1934                                           | 91        | III | not detected            | not detected    |
| H44 | 1997 | 1  | 1  | not determined ( <i>glcK</i> atypical) - CC103 | 103       | Ia  | <i>ermB, tetO</i>       | not detected    |
| H45 | 2000 | 1  | 1  | 103                                            | 103       | Ia  | <i>tetO</i>             | not detected    |

\*NT: non typeable
